# Supplementary material for: Donor-rich and acceptor-rich pyridine-phosphadiazonium adducts: Diversifying the Lewis acceptor chemistry of phosphorus(iii)
Source: Royal Society of Chemistry journal article supplement (doi:10.1039/b412267d), 2004-01-01
Supplement: b412267d.doc [file b412267d.doc]

**Donor-rich and acceptor-rich pyridine-phosphadiazonium adducts:**

**Diversifying the Lewis acceptor chemistry of phosphorus(III)**

**Neil Burford, Heather A. Spinney, Michael J. Ferguson and Robert McDonald**

**Supplementary Information**

# Experimental Data

All reactions were performed in 20mL glass vials in a glove box with a nitrogen atmosphere (Braun; O2, H2O < 0.1 ppm). Solvents were distilled prior to use. CH2Cl2 was dried at reflux over CaH2, P2O5, and again CaH2. Benzene, hexane, and pentane were dried at reflux over K. IR data were collected on a Bruker Vector 22 FT-IR spectrometer and Raman data were collected on a Bruker RFS 100 FT-Raman spectrometer, and both are reported in cm-1 with ranked intensities in parentheses. Solution (CD2Cl2) NMR data (reported in ppm for  and Hz for J) were obtained on Bruker AC-250 and Bruker Avance 500 spectrometers. Solid state NMR spectra with cross polarization and magic angle spinning were obtained on a Bruker AMX-400 spectrometer. X-ray crystallographic data were obtained on a Bruker PLATFORM/SMART 1000 CCD diffractometer, using graphite-monochromated Mo Kα (λ = 0.71073 Å) radiation.

**1[OTf]** (L = DMAP):Mes*NPOTf (0.100 g, 0.23 mmol) and DMAP (0.028 g, 0.23 mmol) in C6H6 (6 mL) gave a pink solution and solid, which was stirred for 30 minutes at RT. The solid was separated by decantation and washed with 4 mL of n-pentane, yield: 90%; mp. 164 – 165 ºC; Anal. Calcd. (Found): C 55.6 (57.0), H 7.0 (7.2), N 7.5 (7.5); IR: 3086(17), 1631(2), 1601(18), 1575(13), 1502(12), 1407(9), 1364(7), 1318(15), 1279(4), 1246(1), 1157(6), 1061(21), 1028(5), 1011(3), 880(22), 833(11), 758(16), 687(19), 636(8), 573(10), 517(14), 451(20); Raman: 3091(9), 3062(7), 2964(1), 2926(3), 2906(3), 2877(6), 1629(9), 1601(6), 1572(7), 1466(2), 1447(1), 1399(8), 1029(5), 991(7), 822(9), 763(8); NMR: 1H 1.3 (s, 9H), 1.4 (s, 18H), 3.3 (s, 6H), 6.9 (d, 3JHH = 8 Hz, 2H), 7.4 (d, 5JPH = 1 Hz, 2H), 8.2 (d, 3JHH = 8 Hz, 2H); 13C{1H} 31 (s), 32 (s), 35 (s), 36 (s), 41 (s), 108 (s), 122 (q, 1JFC = 321 Hz), 123 (s), 136 (d, 3JPC = 8 Hz), 139 (d, 2JPC = 30 Hz), 140 (d, 3JPC = 8 Hz), 147 (s), 158 (s); 19F{1H} –80 (s) ; 31P{1H} 132 (s).

**2[OTf]:** Mes*NPOTf (0.100 g, 0.23 mmol) and DMAP (0.056 g, 0.46 mmol) in CH2Cl2 (3 mL) gave a red solution and was stirred for 30 minutes at RT. Addition of n-pentane (15 mL) gave a yellow microcrystalline solid, which was separated by decanting, and washed with n-pentane (4 mL), yield: 78%; mp. 186 – 188 ºC; Anal. Calcd. (Found): C 58.0 (58.3), H 7.2 (7.0), N 10.2 (9.7); IR: 1624(2), 1560(11), 1525(17), 1417(10), 1399(13), 1331(20), 1293(5), 1264(1), 1223(6), 1212(7), 1148(8), 1051(9), 1035(3), 1010(4), 822(14), 728(19), 639(12), 568(15), 540(16), 518(18); Raman: 3080(5), 2965(1), 2926(1), 2819(7), 1626(6), 1601(3), 1560(5), 1445(6), 1417(5), 1386(7), 1293(2), 1224(7), 1051(3), 1034(4), 943(7), 766(6); NMR: 1H 1.3 (s, 27H), 3.2 (s, 12H), 6.8 (d, 3JHH = 7.5 Hz, 4H), 7.3 (d, 5JPH = 0.5 Hz, 2H), 8.2 (d, 3JHH = 7.3 Hz, 4H); 13C{1H} 31.6 (s), 31. 7(s), 31.9 (s), 35 (s), 36 (s), 40 (s), 108 (s), 122 (q, 1JFC = 321 Hz), 123 (s), 140 (d, 3JPC = 7 Hz), 141 (s), 142 (s), 143 (s), 158 (s); 19F{1H} –80 (s); 31P{1H} 123 (s); CP-MAS 31P: 147. Crystals suitable for X-ray diffraction (and spectroscopically identical to the powder) were obtained from a solution of 80 mg of **2**[OTf] in CH2Cl2 (1.5 mL) in a 20 mL glass vial by the introduction of a 5mL vial containing n-hexane (3 mL).

**3[OTf]2:** Mes*NPOTf (0.050 g, 0.11 mmol) and 4,4’-BIPY (0.009 g, 0.06 mmol) in CH2Cl2 (3 mL) gave a deep red solution, which was stirred for 30 minutes at RT. A 5mL vial containing hexane (3 mL)was placed inside the larger vial, which was then capped. Crystals suitable for X-ray diffraction deposited overnight at room temperature; yield: 57%; mp. 161 – 163 ºC; Anal. Calcd. (Found): C 55.7 (54.2), H 6.4 (6.4), N 5.4 (5.0); IR: 3103(15), 3055(18), 1609(11), 1499(9), 1365(7), 1275(1), 1244(2), 1221(4), 1159(6), 1061(10), 1027(3), 1001(8), 880(16), 829(12), 817(17), 759(19), 738(14), 638(5), 576(20), 518(13); Raman: 3090(14), 2967(7), 2930(8), 2907(10), 1618(2), 1599(5), 1522(4), 1498(1), 1288(3), 1240(11), 1201(14), 1135(11), 1071(11), 1063(11), 1027(9), 1018(6), 822(15), 567(13), 349(16), 273(12), 155(11); NMR: 1H 1.3 (s, 18H), 1.4 (s, 36H), 7.4 (d, 5JPH = 1 Hz, 4H), 7.9 (d, 3JHH = 6 Hz, 4H), 8.9 (d, 3JHH = 6 Hz, 4H); 13C{1H} 30 (s), 31 (s), 35 (s), 36 (s), 120 (q, 1JFC = 320 Hz), 123 (s), 124 (s), 134 (d, 2JPC = 42 Hz), 145 (d, 3JPC = 9 Hz), 147 (s), 149 (s), 152 (s); 19F{1H} –80 (s); 31P{1H} 61 (s); CP-MAS 31P: 60, 63.
